# Supplementary material for: Two New Flavonoids from the Nuts of Areca catechu
Source: PubMed Central journal article supplement (PMC6721780; doi:10.3390/molecules24162862), 2019-08-07
Supplement: molecules-24-02862-s001.pdf [file molecules-24-02862-s001.pdf]

## Supporting Information

### Two new flavonoids from the nuts of *Areca catechu*

Mengfei Yuan<sup>†</sup>, Yunlin Ao<sup>†</sup>, Nan Yao, Jing Xie, Dongmei Zhang, Jian Zhang<sup>\*</sup>,  
Xiaoqi Zhang<sup>\*</sup> and Wencai Ye

Institute of Traditional Chinese Medicine & Natural Products, and Guangdong  
Provincial Engineering Research Center for Modernization of TCM, College of  
Pharmacy, Jinan University, Guangzhou 510632, P. R. China

<sup>†</sup> They contributed equally to this work.

## **List of Supporting Information**

S3–6. Computational data of **1**.

S7. Cytotoxicity assay

S8. HRESIMS and UV and IR spectra of **1**.

S9–11. 1D and 2D NMR spectra of **1** in CD<sub>3</sub>OD.

S12. HRESIMS and UV and IR spectra of **2**.

S13–15. 1D and 2D NMR spectra of **2** in CD<sub>3</sub>OD.

**Computational data of 1.** The systematic random conformational analysis of one pair of enantiomers (2*S*-**1**, 2*R*-**1**) were performed in the SYBYL 8.1 program by using MMFF94s molecular force field, which afforded 12 conformers for **1**, with an energy cutoff of 10 kcal mol<sup>-1</sup> to the global minima. All of the obtained conformers were further optimized using DFT at the B3LYP/6-31+G(d) level in gas phase by using Gaussian09 software.<sup>1</sup> All of the optimized stable conformers were used for TDDFT computation of the excited states at the same levels, with the consideration of the first 50 excitations. The overall ECD curves of **1** were weighted by Boltzmann distribution of each conformer (with a half-bandwidth of 0.3 eV). The calculated ECD spectra of **1** were subsequently compared with the experimental ones. The ECD spectra were produced by SpecDis 1.6 software.<sup>2</sup>

**Table S1.** Key transitions and their related rotatory and oscillator strengths of conformer **1** at the B3LYP/6-31+G(d) level in the gas phase.

| <b>HOMO is 111</b> |                                     |                            |                       |                          |                                                         |
|--------------------|-------------------------------------|----------------------------|-----------------------|--------------------------|---------------------------------------------------------|
| <b>No.</b>         | <b>Energy<br/>(cm<sup>-1</sup>)</b> | <b>Wavelength<br/>(nm)</b> | <b>R<br/>(length)</b> | <b>Osc.<br/>Strength</b> | <b>Major contribs</b>                                   |
| 1                  | 29941.12032                         | 333.9888385                | 57.0375               | 0.0439                   | HOMO->LUMO (96%)                                        |
| 2                  | 32919.7464                          | 303.7690473                | -3.5705               | 0.0109                   | H-5->LUMO (13%),<br>H-2->LUMO (10%),<br>H-1->LUMO (75%) |
| 3                  | 33660.16848                         | 297.0870454                | -27.2091              | 0.0678                   | H-3->LUMO (12%),<br>H-2->LUMO (69%),<br>H-1->LUMO (14%) |
| 4                  | 34231.21296                         | 292.1310446                | 12.6766               | 0.0036                   | H-5->LUMO (81%)                                         |
| 5                  | 36383.11504                         | 274.8527714                | 46.1947               | 0.2134                   | H-3->LUMO (78%)                                         |
| 6                  | 36794.46064                         | 271.7800404                | 0.1195                | 0.0001                   | H-4->LUMO (93%)                                         |
| 7                  | 37898.64128                         | 263.8617022                | -4.9189               | 0.0064                   | HOMO->L+1 (94%)                                         |
| 8                  | 39030.24496                         | 256.2115613                | 1.0138                | 0.0087                   | H-3->L+1 (10%),<br>H-2->L+1 (60%)                       |
| 9                  | 41033.74                            | 243.7018902                | 35.284                | 0.1066                   | H-3->L+1 (12%),<br>H-1->L+1 (77%)                       |
| 10                 | 41615.26976                         | 240.2964118                | 0.6462                | 0.0007                   | H-4->L+1 (87%)                                          |
| 11                 | 41856.4312                          | 238.9119118                | -17.4058              | 0.0378                   | H-3->L+1 (59%),<br>H-2->L+1 (19%),<br>H-1->L+1 (11%)    |
| 12                 | 42767.03744                         | 233.8249409                | 1.7136                | 0.0016                   | HOMO->L+2 (72%),<br>HOMO->L+3 (22%)                     |
| 13                 | 43557.46624                         | 229.5817655                | -30.1182              | 0.0431                   | H-8->LUMO (25%),                                        |

|    |             |             |          |        |                                                                           |
|----|-------------|-------------|----------|--------|---------------------------------------------------------------------------|
|    |             |             |          |        | HOMO->L+2 (15%),<br>HOMO->L+3 (51%)                                       |
| 14 | 43811.53264 | 228.2504034 | 0.6707   | 0.0016 | H-6->LUMO (84%)                                                           |
| 15 | 43929.2904  | 227.6385507 | 23.5851  | 0.0083 | H-8->LUMO (40%),<br>H-6->LUMO (13%),<br>HOMO->L+4 (25%)                   |
| 16 | 44701.97488 | 223.7037631 | -1.0664  | 0.0047 | H-1->L+2 (52%),<br>H-1->L+3 (23%)                                         |
| 17 | 44809.24736 | 223.1682206 | -51.8387 | 0.0833 | H-2->L+3 (22%),<br>H-2->L+4 (11%)                                         |
| 18 | 44902.00176 | 222.7072203 | -21.2865 | 0.0187 | H-2->L+2 (30%),<br>H-2->L+3 (14%),<br>HOMO->L+4 (16%),<br>HOMO->L+5 (17%) |
| 19 | 45174.61904 | 221.3632392 | 23.7348  | 0.0285 | H-2->L+2 (28%),<br>HOMO->L+4 (19%),<br>HOMO->L+5 (23%)                    |
| 20 | 45618.22704 | 219.2106237 | -2.2046  | 0.0032 | H-7->LUMO (94%)                                                           |
| 21 | 45983.59872 | 217.4688428 | -63.7337 | 0.0879 | H-1->L+3 (17%),<br>H-1->L+4 (26%),<br>HOMO->L+5 (20%)                     |
| 22 | 46311.86864 | 215.9273701 | 16.108   | 0.0322 | H-1->L+4 (28%),<br>H-1->L+5 (13%),<br>HOMO->L+6 (11%)                     |
| 23 | 46497.37744 | 215.065893  | 38.4593  | 0.0268 | H-3->L+2 (29%),<br>H-3->L+3 (10%),<br>HOMO->L+6 (22%)                     |
| 24 | 46656.26976 | 214.3334658 | 2.4639   | 0.0008 | H-4->L+2 (30%),<br>H-4->L+3 (37%),<br>H-4->L+4 (12%),<br>H-3->L+2 (10%)   |
| 25 | 46741.76512 | 213.9414285 | -13.2479 | 0.0279 | H-3->L+2 (15%),<br>H-2->L+4 (15%),<br>HOMO->L+6 (24%)                     |
| 26 | 46899.04432 | 213.2239611 | -13.0012 | 0.0154 | H-2->L+4 (36%),<br>HOMO->L+6 (14%)                                        |
| 27 | 47178.92064 | 211.959067  | -6.1891  | 0.0376 | H-3->L+4 (14%), H-2->L+5<br>(13%)                                         |
| 28 | 47278.93408 | 211.5106906 | -1.324   | 0.0022 | H-5->L+1 (85%)                                                            |
| 29 | 47403.95088 | 210.9528808 | 44.5125  | 0.0271 | H-2->L+5 (10%), H-1->L+8<br>(19%)                                         |
| 30 | 47601.55808 | 210.0771572 | -16.7411 | 0.0274 | H-3->L+3 (19%), H-3->L+4<br>(13%), H-2->L+5 (15%),<br>H-1->L+5 (18%)      |

**Table S2.** Cartesian coordinates of conformer **1**.

| <b>Standard orientation:</b> |               |               |                                |          |           |
|------------------------------|---------------|---------------|--------------------------------|----------|-----------|
| <b>Center</b>                | <b>Atomic</b> | <b>Atomic</b> | <b>Coordinates (Angstroms)</b> |          |           |
| <b>Number</b>                | <b>Number</b> | <b>Type</b>   | <b>X</b>                       | <b>Y</b> | <b>Z</b>  |
| 1                            | 6             | 0             | -4.29183                       | 1.302612 | -0.974744 |
| 2                            | 6             | 0             | -4.49025                       | 0.023753 | -1.50899  |
| 3                            | 6             | 0             | -3.93975                       | -1.08809 | -0.88177  |
| 4                            | 6             | 0             | -3.18074                       | -0.92978 | 0.277546  |
| 5                            | 6             | 0             | -2.95955                       | 0.338323 | 0.804458  |
| 6                            | 6             | 0             | -3.52845                       | 1.455712 | 0.188096  |
| 7                            | 6             | 0             | -2.63208                       | -2.09631 | 0.979262  |
| 8                            | 6             | 0             | -1.92778                       | -1.83422 | 2.279217  |
| 9                            | 6             | 0             | -1.24523                       | -0.46698 | 2.22463   |
| 10                           | 8             | 0             | -2.21227                       | 0.565278 | 1.931069  |
| 11                           | 6             | 0             | -0.00933                       | -0.30293 | 1.340689  |
| 12                           | 6             | 0             | 0.575481                       | -1.36084 | 0.628381  |
| 13                           | 6             | 0             | 1.708967                       | -1.15355 | -0.16676  |
| 14                           | 6             | 0             | 2.306692                       | 0.11557  | -0.20417  |
| 15                           | 6             | 0             | 1.716792                       | 1.198713 | 0.463485  |
| 16                           | 6             | 0             | 0.579812                       | 0.973716 | 1.246451  |
| 17                           | 8             | 0             | 3.412303                       | 0.31609  | -1.00186  |
| 18                           | 6             | 0             | 4.663929                       | 0.205733 | -0.27925  |
| 19                           | 6             | 0             | 5.446005                       | -0.99011 | -0.84166  |
| 20                           | 6             | 0             | 5.467459                       | 1.486939 | -0.54739  |
| 21                           | 8             | 0             | 4.955915                       | 2.583584 | 0.202179  |
| 22                           | 8             | 0             | 4.922392                       | -2.22273 | -0.35914  |
| 23                           | 8             | 0             | -4.17434                       | -2.32122 | -1.42952  |
| 24                           | 8             | 0             | -2.81026                       | -3.21653 | 0.505777  |
| 25                           | 8             | 0             | 2.311645                       | 2.423559 | 0.293137  |
| 26                           | 6             | 0             | 1.585579                       | 3.563639 | 0.746828  |
| 27                           | 8             | 0             | 2.312555                       | -2.1392  | -0.91023  |
| 28                           | 6             | 0             | 1.489777                       | -3.24293 | -1.28326  |
| 29                           | 8             | 0             | -4.89159                       | 2.312212 | -1.67794  |
| 30                           | 6             | 0             | -4.71799                       | 3.634621 | -1.18397  |
| 31                           | 1             | 0             | -5.08216                       | -0.1029  | -2.41162  |
| 32                           | 1             | 0             | -3.35002                       | 2.430457 | 0.630141  |
| 33                           | 1             | 0             | -1.21179                       | -2.63613 | 2.483217  |
| 34                           | 1             | 0             | -2.69389                       | -1.84687 | 3.063737  |
| 35                           | 1             | 0             | -0.89778                       | -0.26032 | 3.246132  |
| 36                           | 1             | 0             | 0.152565                       | -2.35691 | 0.697705  |
| 37                           | 1             | 0             | 0.11961                        | 1.78688  | 1.802142  |
| 38                           | 1             | 0             | 4.489105                       | 0.081464 | 0.798082  |
| 39                           | 1             | 0             | 5.405824                       | -1.01473 | -1.93585  |
| 40                           | 1             | 0             | 6.494723                       | -0.9539  | -0.53121  |

|    |   |   |          |          |          |
|----|---|---|----------|----------|----------|
| 41 | 1 | 0 | 6.514386 | 1.36609  | -0.25296 |
| 42 | 1 | 0 | 5.43086  | 1.763515 | -1.60639 |
| 43 | 1 | 0 | 3.982457 | 2.573028 | 0.083826 |
| 44 | 1 | 0 | 3.979175 | -2.24494 | -0.62527 |
| 45 | 1 | 0 | -3.72727 | -2.98735 | -0.85101 |
| 46 | 1 | 0 | 2.132102 | 4.455099 | 0.424267 |
| 47 | 1 | 0 | 0.586841 | 3.605176 | 0.299379 |
| 48 | 1 | 0 | 1.534624 | 3.582746 | 1.84009  |
| 49 | 1 | 0 | 2.020907 | -3.80578 | -2.05684 |
| 50 | 1 | 0 | 1.334447 | -3.91319 | -0.43215 |
| 51 | 1 | 0 | 0.535569 | -2.91109 | -1.70673 |
| 52 | 1 | 0 | -5.25237 | 4.314675 | -1.85431 |
| 53 | 1 | 0 | -5.15219 | 3.742496 | -0.18456 |
| 54 | 1 | 0 | -3.66153 | 3.92257  | -1.19022 |

[1] Gaussian 09, Revision A.02, M. J. Frisch, G. W. Trucks, H. B. Schlegel, G. E. Scuseria, M. A. Robb, J. R. Cheeseman, G. Scalmani, V. Barone, B. Mennucci, G. A. Petersson, H. Nakatsuji, M. Caricato, X. Li, H. P. Hratchian, A. F. Izmaylov, J. Bloino, G. Zheng, J. L. Sonnenberg, M. Hada, M. Ehara, K. Toyota, R. Fukuda, J. Hasegawa, M. Ishida, T. Nakajima, Y. Honda, O. Kitao, H. Nakai, T. Vreven, J. A. Montgomery, Jr., J. E. Peralta, F. Ogliaro, M. Bearpark, J. J. Heyd, E. Brothers, K. N. Kudin, V. N. Staroverov, R. Kobayashi, J. Normand, K. Raghavachari, A. Rendell, J. C. Burant, S. S. Iyengar, J. Tomasi, M. Cossi, N. Rega, J. M. Millam, M. Klene, J. E. Knox, J. B. Cross, V. Bakken, C. Adamo, J. Jaramillo, R. Gomperts, R. E. Stratmann, O. Yazyev, A. J. Austin, R. Cammi, C. Pomelli, J. W. Ochterski, R. L. Martin, K. Morokuma, V. G. Zakrzewski, G. A. Voth, P. Salvador, J. J. Dannenberg, S. Dapprich, A. D. Daniels, O. Farkas, J. B. Foresman, J. V. Ortiz, J. Cioslowski, and D. J. Fox, Gaussian, Inc., Wallingford CT, 2009.

[2] T. Bruhn, A. Schaumlöffel, Y. Hemberger, G. Bringmann, SpecDis version 1.60, University of Wuerzburg, Germany, 2012.

### **Evaluation of cytotoxicity activities of 1–8**

The cytotoxic effects of compounds **1–8** on the viability of three human cancer cell lines were determined by the MTT assay. Compounds **1** and **2** exhibited a moderate cytotoxic activity against HepG2 cell lines with  $IC_{50}$  values of 49.8 and 53.6  $\mu\text{M}$ , respectively, and the other compounds exhibited no cytotoxicity with  $IC_{50}$  values over 100  $\mu\text{M}$ .

### **Cytotoxicity assay**

Human breast cancer MCF-7, hepatocellular carcinoma HepG2, and lung cancer A-549 cell lines were obtained from the American Type Culture Collection (ATCC). The three cells were cultured in the RPMI 1640 medium containing 100 units/ml penicillin and 100  $\mu\text{g/ml}$  streptomycin with 10% FBS in a humidified atmosphere of 95% air and 5%  $\text{CO}_2$  (v/v) at 37°C. The three human cancer cell lines were grown in 96-well culture plates for 48 h. After that, the cells were treated with compounds **1–8** at various concentrations for 72 h. A 30  $\mu\text{L}$  aliquot of MTT solution (5 mg/mL) was added into each well and incubated for another 4 h. Subsequently, the medium was removed and adding 100  $\mu\text{L}$  of DMSO to dissolve the purple formazan, the absorbance was recorded at 570 nm using a microplate Reader (Thermo scientific multiskan MK3, USA). Each well was performed in triplicate in 3 independent experiments. The concentration giving 50% inhibition ( $IC_{50}$ ) was determined from the dose-response curves using Prism software and expressed as the mean  $\pm$  SD.

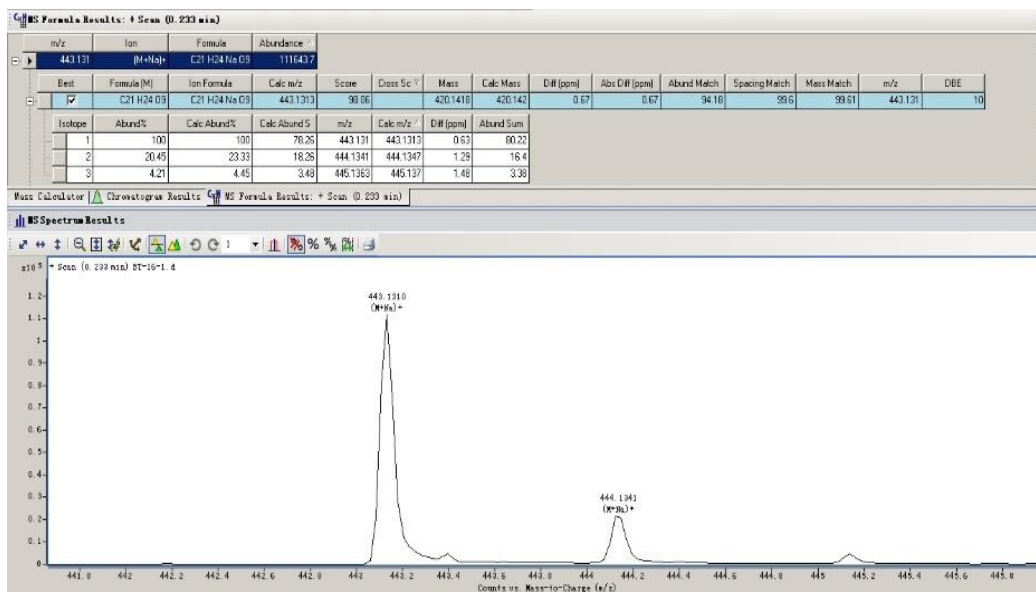

Figure S1. HRESIMS spectrum of **1**

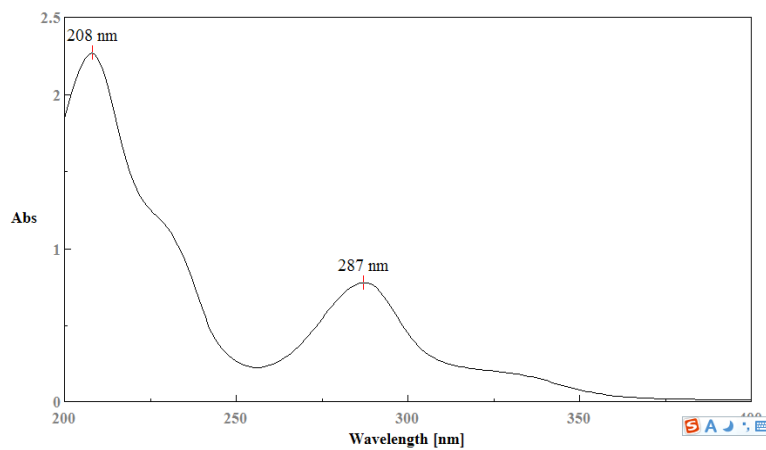

Figure S2. UV spectrum of **1** (MeOH)

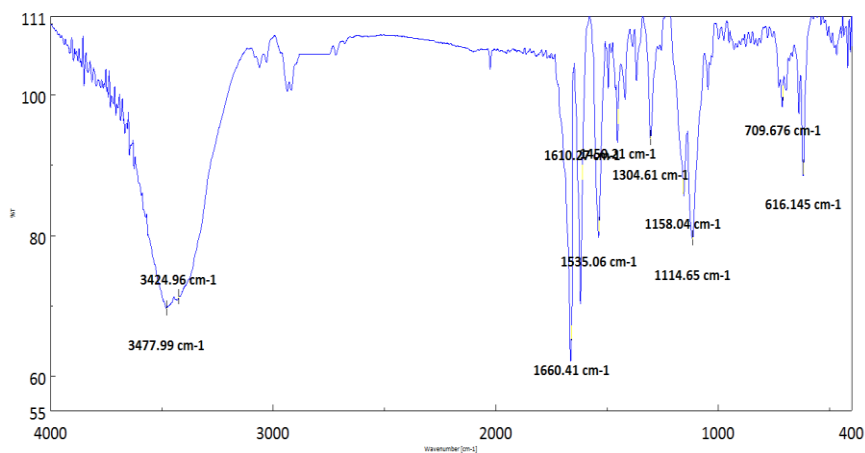

Figure S3. IR spectrum of **1** (KBr disc)



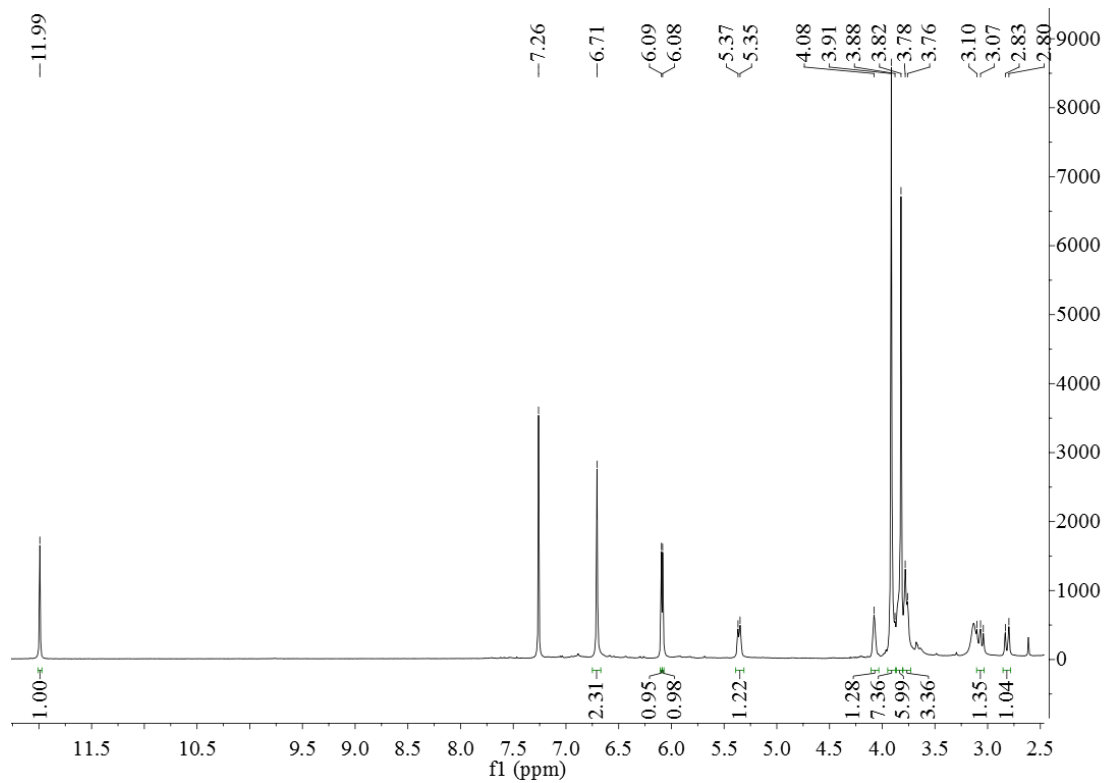

**Figure S4.**  $^1\text{H}$  NMR spectrum of **1** (500 Hz,  $\text{CDCl}_3$ )

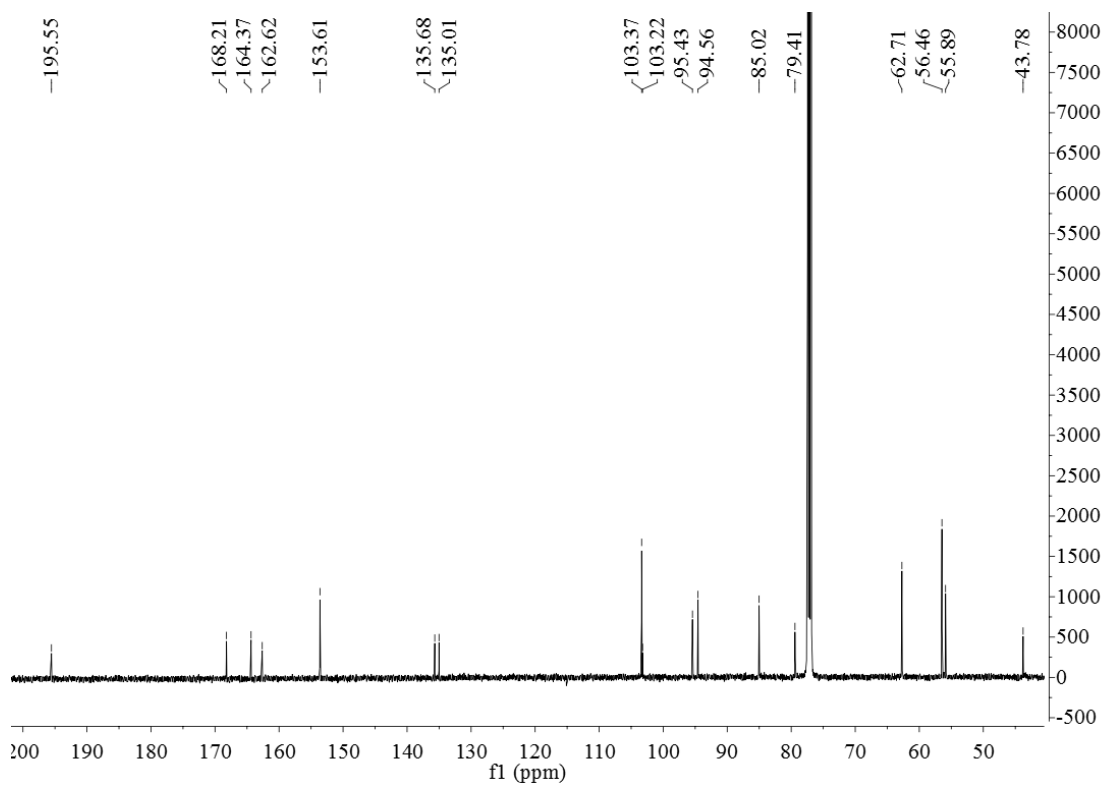

**Figure S5.**  $^{13}\text{C}$  NMR spectrum of **1** (125 Hz,  $\text{CDCl}_3$ )

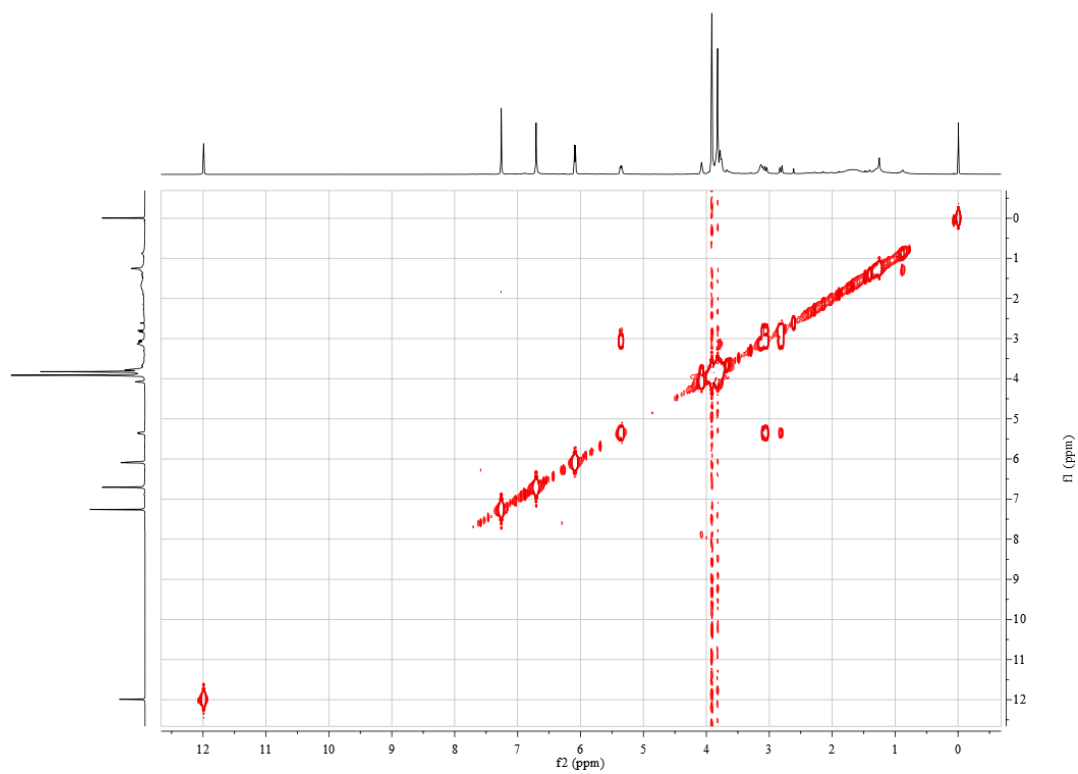

**Figure S6.**  $^1\text{H}$ - $^1\text{H}$  COSY spectrum of **1** ( $\text{CDCl}_3$ )

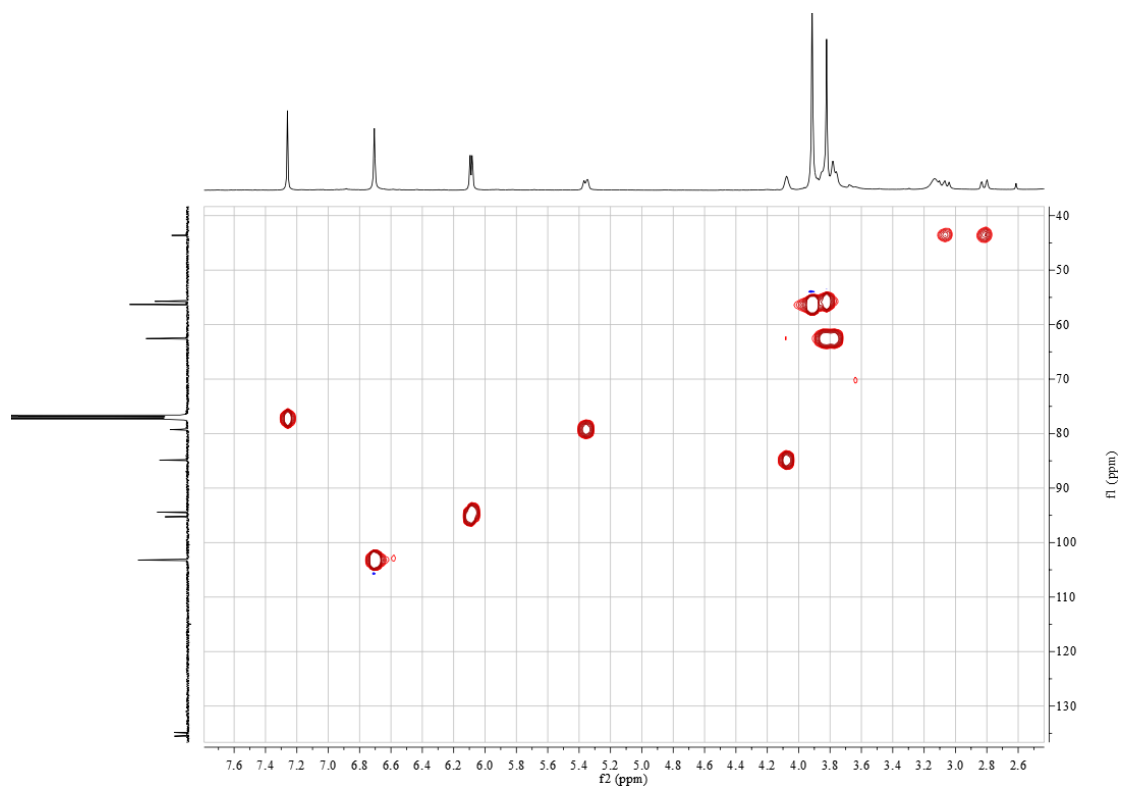

**Figure S7.** HSQC spectrum of **1** ( $\text{CDCl}_3$ )

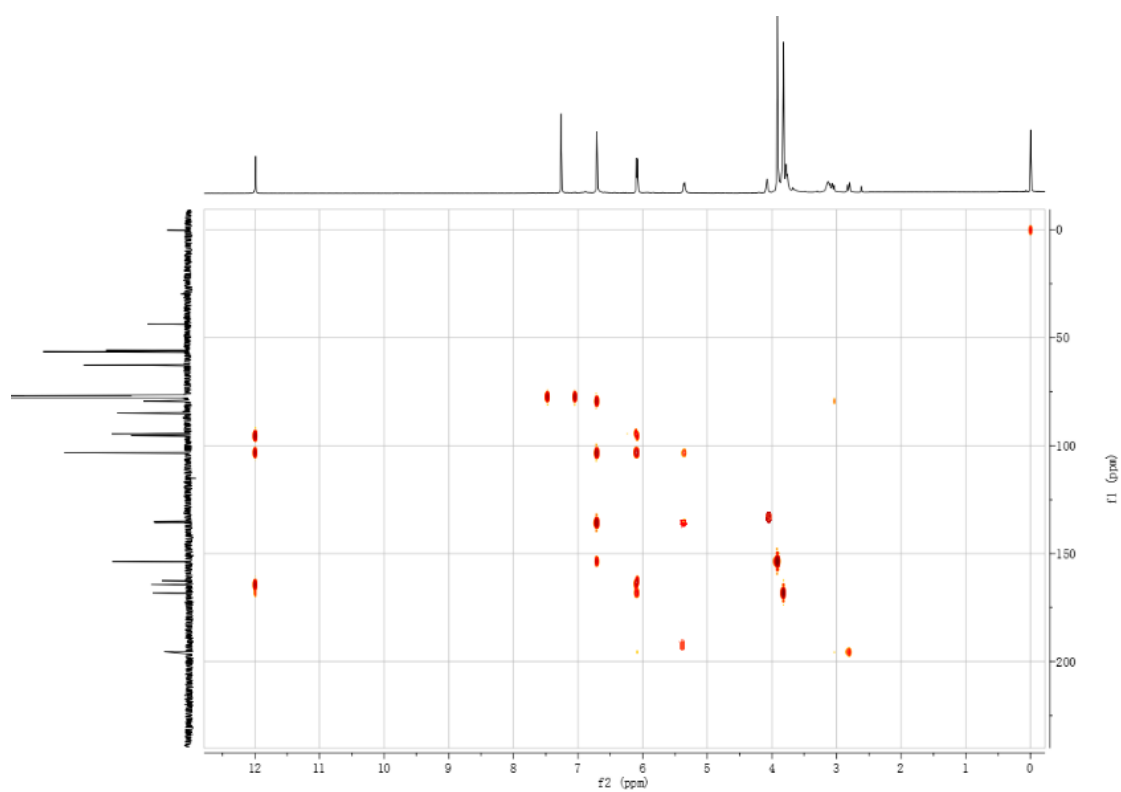

**Figure S8.** HMBC spectrum of **1** (CDCl<sub>3</sub>)

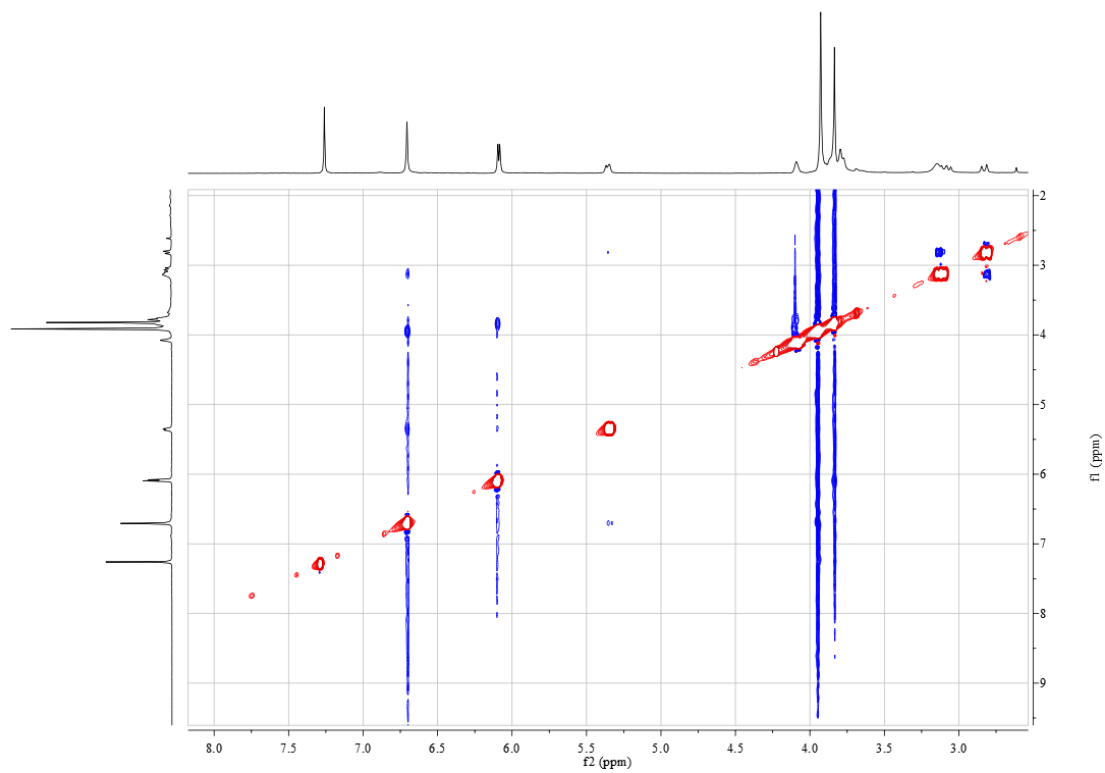

**Figure S9.** NOESY spectrum of **1** (CDCl<sub>3</sub>)

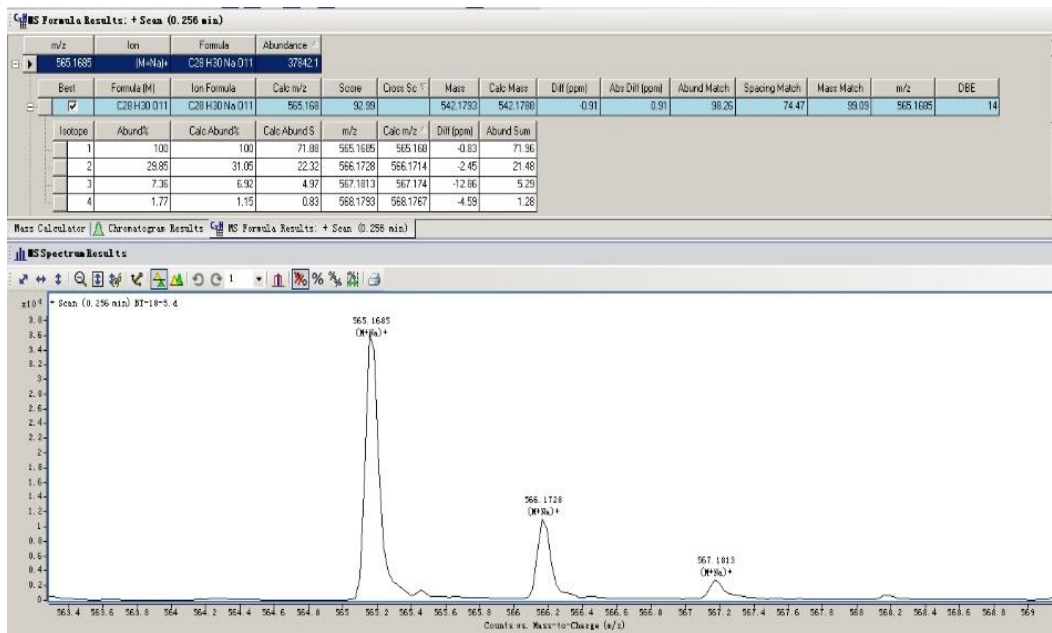

Figure S10. HRESIMS spectrum of **2**

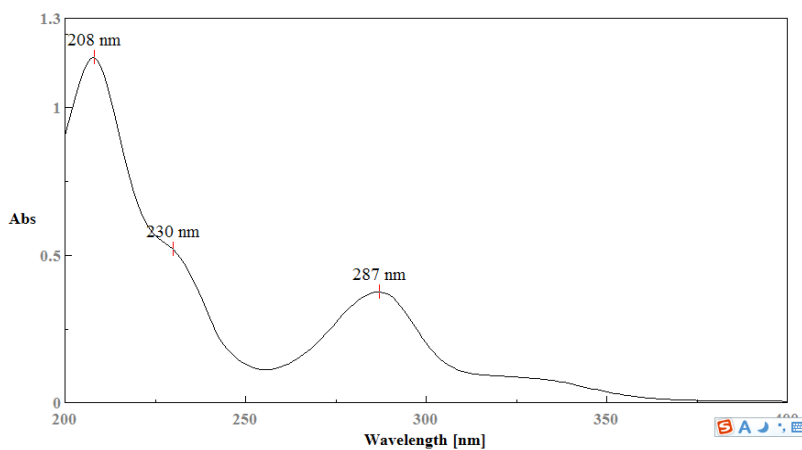

Figure S11. UV spectrum of **2** (CH<sub>3</sub>OH)

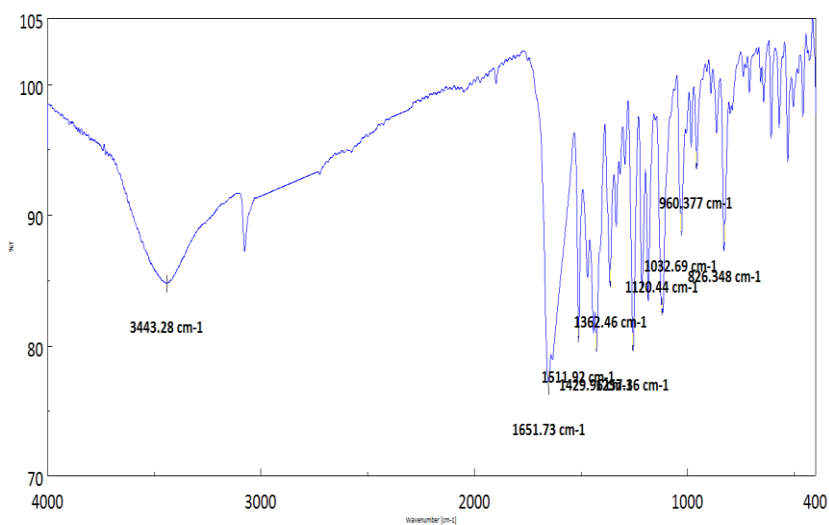

Figure S12. IR spectrum of **2** (KBr disc)

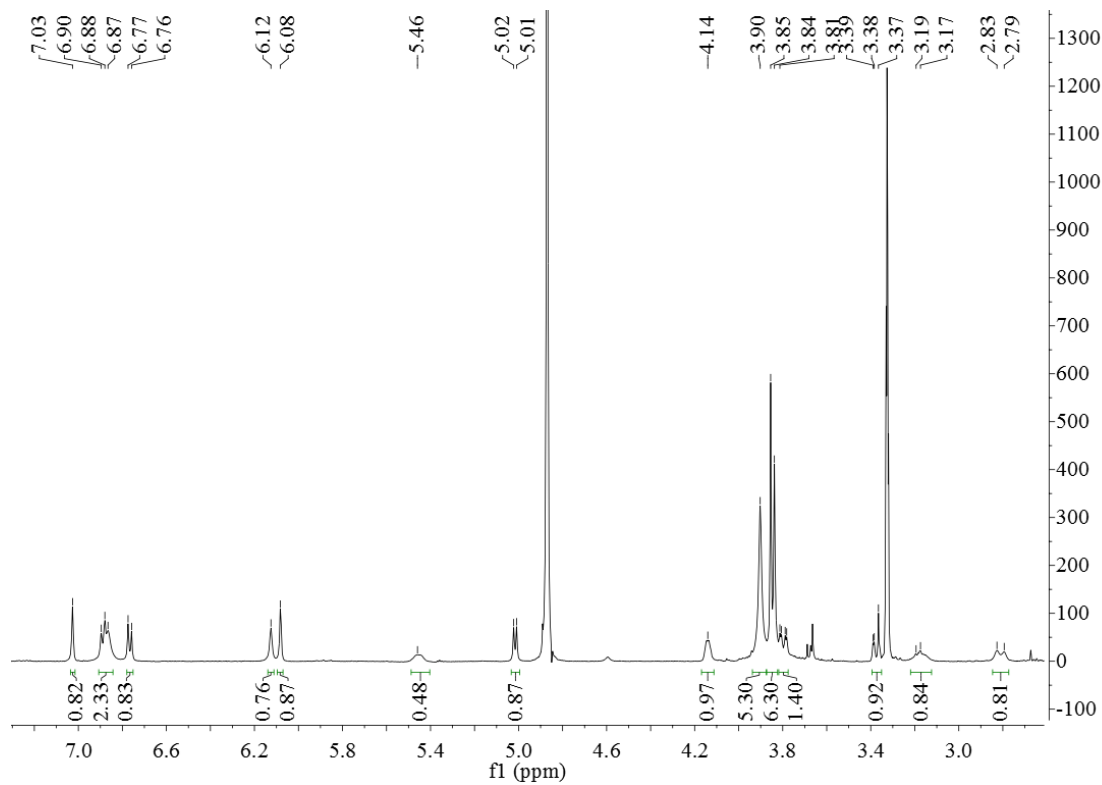

**Figure S13.**  $^1\text{H}$  NMR spectrum of **2** (500 Hz,  $\text{CD}_3\text{OD}$ )

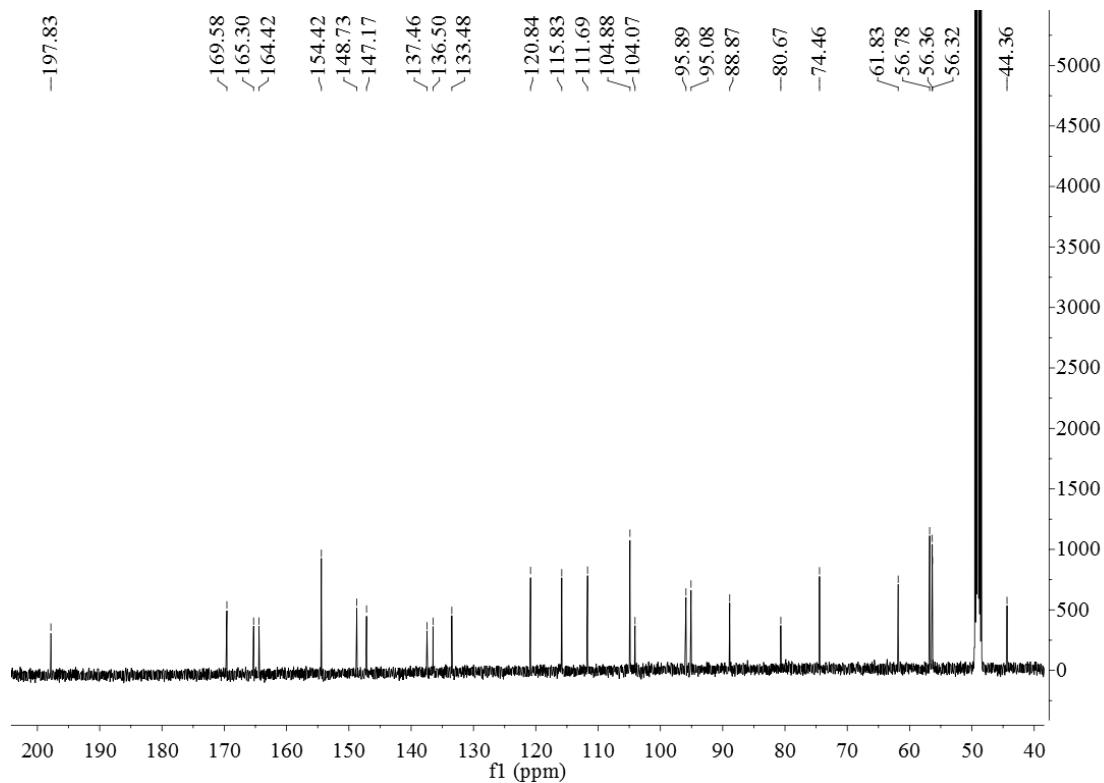

**Figure S14.**  $^{13}\text{C}$  NMR spectrum of **2** (125 Hz,  $\text{CD}_3\text{OD}$ )

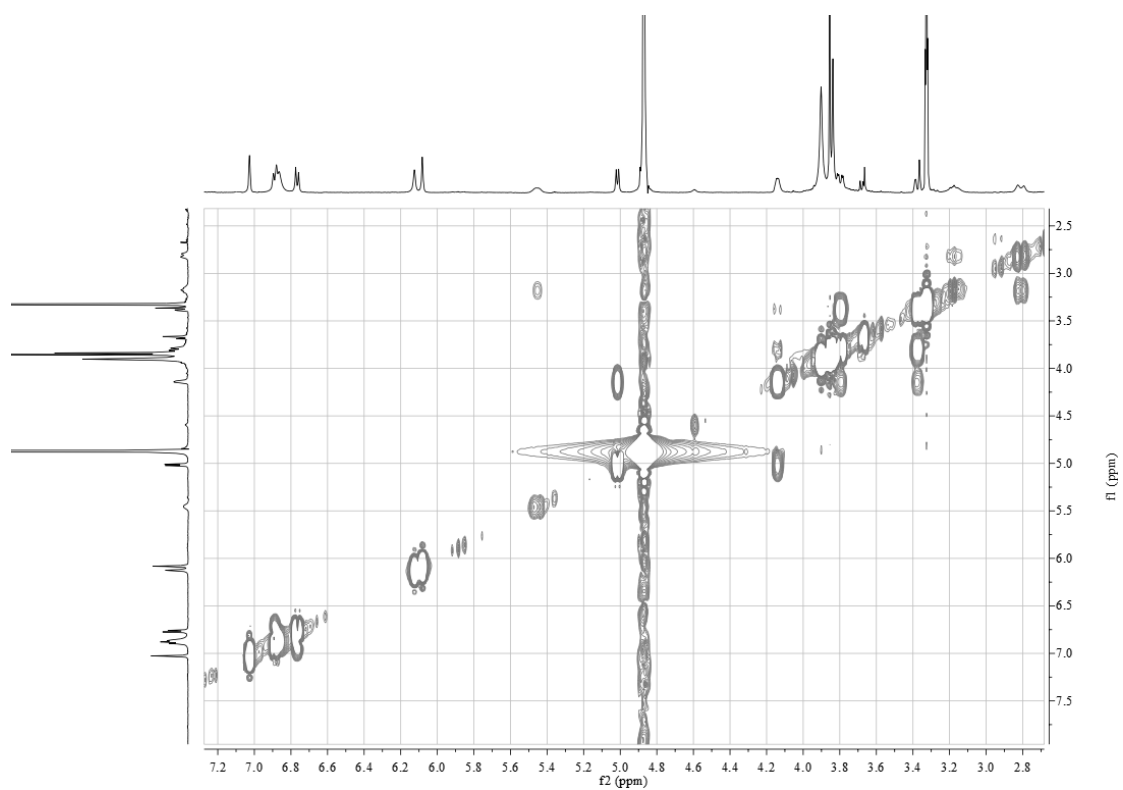

**Figure S15.**  $^1\text{H}$ - $^1\text{H}$  COSY spectrum of **2** ( $\text{CD}_3\text{OD}$ )

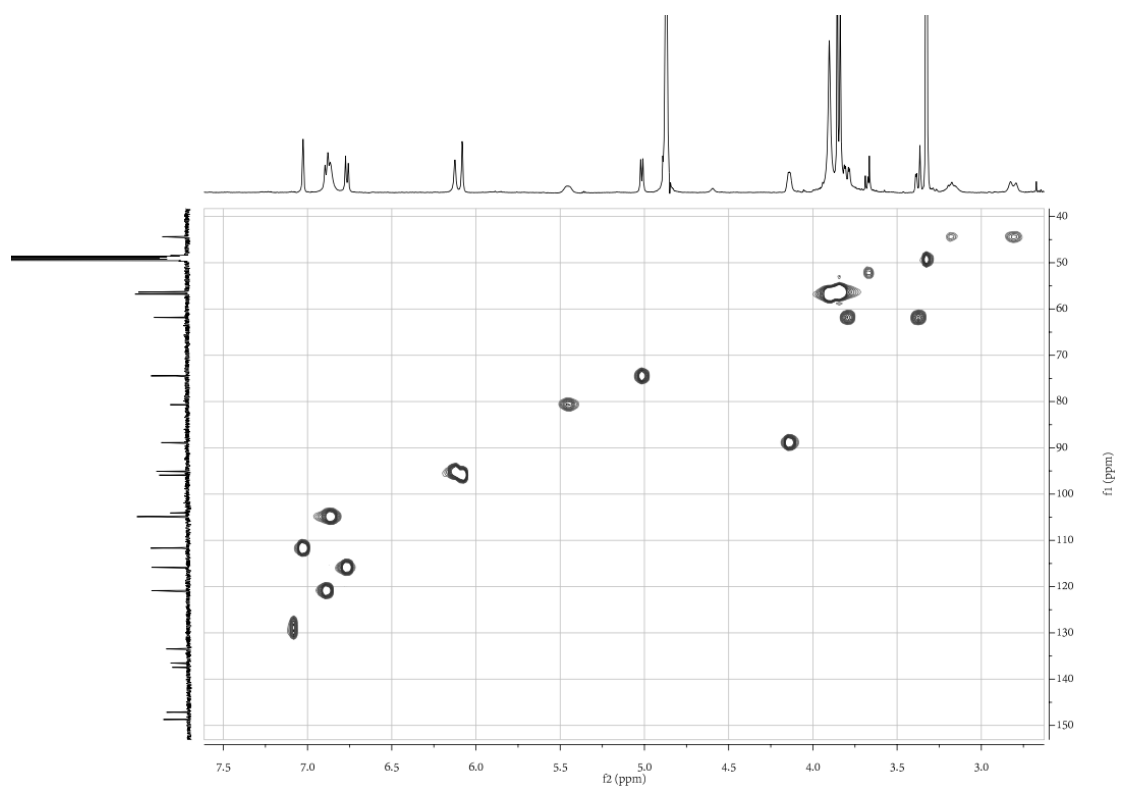

**Figure S16.** HSQC spectrum of **2** ( $\text{CD}_3\text{OD}$ )

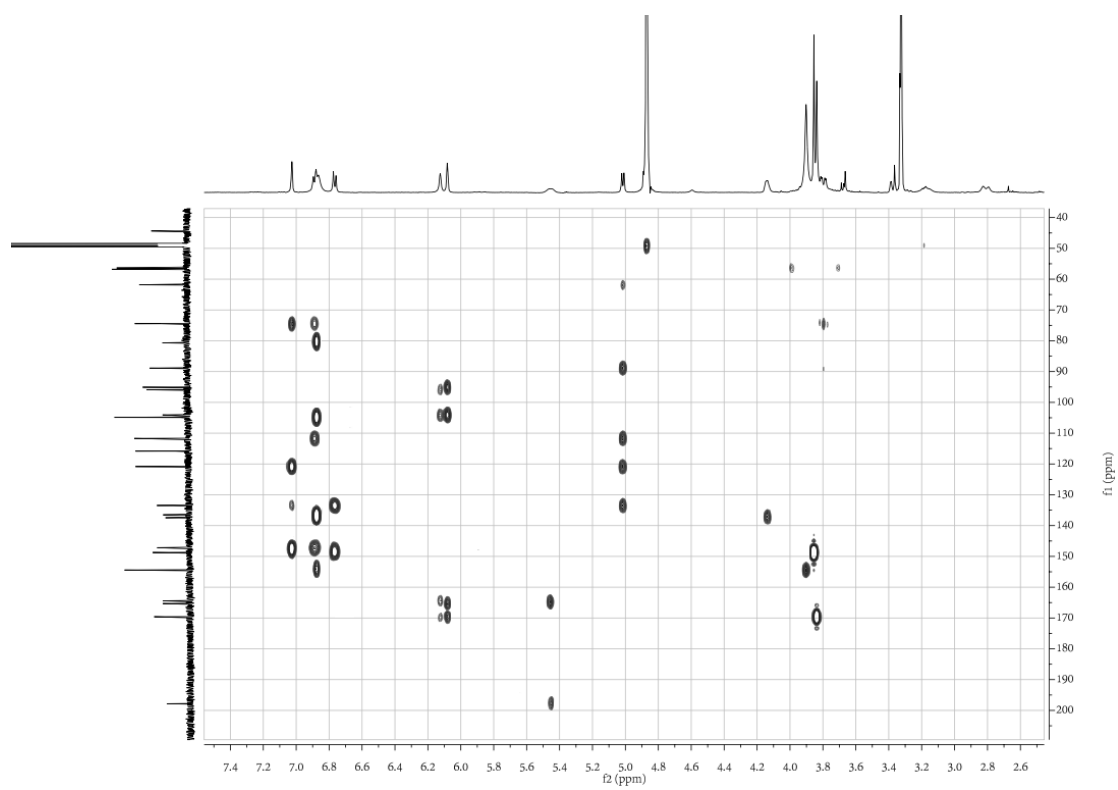

**Figure S17.** HMBC spectrum of **2** (CD<sub>3</sub>OD)
